# Supplementary material
Source: ML conference proceedings conference paper supplement (https://proceedings.mlr.press/v108/rush20a.html)
Supplement: Supplementary file 1 [file rush20a-supp.pdf]

---

# Supplementary Material for “An Asymptotic Rate for the LASSO Loss”

---

Cynthia Rush  
Columbia University

## 1 SUPPLEMENTARY MATERIAL

In the supplementary material we include a number of Lemmas that will be used in the technical proofs of our main results. When the proof is straightforward, it is omitted.

**Lemma 1** (Concentration of Square Roots). *Let  $c \neq 0$  and  $X_n$  be a random variable. If  $P(X_n^2 - c^2 \geq \epsilon) \leq Ke^{-\kappa n \epsilon^2}$ , then  $P(|X_n| - |c| \geq \epsilon) \leq Ke^{-\kappa n |c|^2 \epsilon^2}$ .*

**Lemma 2** (Gaussian Concentration). *For i.i.d. standard Gaussian random variables  $Z_1, Z_2, \dots, Z_N$  and  $0 \leq \epsilon \leq 1$ ,*

$$P\left(\left|\frac{1}{n} \sum_{i=1}^n Z_i^2 - 1\right| \geq \epsilon\right) \leq 2 \exp\left\{\frac{-n\epsilon^2}{8}\right\}.$$

**Lemma 3.** *Let  $\ker(\mathbf{X})$  denote the kernel of a matrix  $\mathbf{X} \in \mathbb{R}^{n \times p}$  and  $\mathbf{v}_1, \mathbf{v}_2 \in \mathbb{R}^p$  vectors with  $\mathbf{v}_1 \in \ker(\mathbf{X})^\perp$ . Then  $\sigma_{\min}^2 \|\mathbf{v}_2\|^2 \leq \|\mathbf{X}\mathbf{v}_2\|^2 \leq \sigma_{\max}^2 \|\mathbf{v}_2\|^2$  where  $\sigma_{\min}^2(\mathbf{X})$  and  $\sigma_{\max}^2(\mathbf{X})$  are the minimum and maximum singular values of  $\mathbf{X}$  and  $\hat{\sigma}_{\min}^2 \|\mathbf{v}_1\|^2 \leq \|\mathbf{X}\mathbf{v}_1\|^2 \leq \sigma_{\max}^2 \|\mathbf{v}_1\|^2$ , where  $\hat{\sigma}_{\min}(\mathbf{X})$  is the minimum, non-zero singular value of  $\mathbf{X}$ .*

**Lemma 4** ([Kashin, 1977]). *For any dimension  $p > 0$ , with probability at least  $1 - 2^{-p}$ , for any uniformly random subspace  $\mathcal{V}_{(p,r)}$  with dimension  $\lfloor p(1-r) \rfloor$  where  $0 \leq r \leq 1$  is a positive constant, for all vectors  $\mathbf{v} \in \mathcal{V}_{(p,r)}$ ,*

$$c_r \|\mathbf{v}\| \leq \|\mathbf{v}\|_1 / \sqrt{p},$$

where  $c_r$  is a universal constant (not depending on  $p$ ).

**Lemma 5.** [Rudelson and Vershynin, 2010] *Let  $\mathbf{X}$  be an  $n \times p$  random matrix with i.i.d.  $\mathcal{N}(0, 1/n)$  entries and  $n \leq p$ . If  $\sigma_{\max}(\mathbf{X})$  and  $\hat{\sigma}_{\min}(\mathbf{X})$  are the minimum and maximum non-zero singular values of  $\mathbf{X}$  then for  $\delta = n/p$ , the probabilities  $P(\sigma_{\max}(\mathbf{X}) \geq 1 + \sqrt{\delta} + \epsilon)$  and  $P(\hat{\sigma}_{\min}(\mathbf{X}) \leq 1 - \sqrt{\delta} - \epsilon)$  are upper bounded by  $e^{-n\epsilon^2/2}$ . Let  $\tilde{\mathbf{X}}$  be an  $n \times p$  random matrix with i.i.d.  $\mathcal{N}(0, 1/n)$  entries and  $n \geq p$ . If  $\sigma_{\max}(\tilde{\mathbf{X}})$  and  $\sigma_{\min}(\tilde{\mathbf{X}})$  are the largest and smallest singular values of  $\tilde{\mathbf{X}}$  then, the probabilities  $P(\sigma_{\max}(\tilde{\mathbf{X}}) \geq 1 + \frac{1}{\sqrt{\delta}} + \epsilon)$*

and  $P(\sigma_{\min}(\tilde{\mathbf{X}}) \leq 1 - \frac{1}{\sqrt{\delta}} - \epsilon)$  are upper bounded by  $e^{-n\epsilon^2/2}$ .

*Proof.* The result for  $\tilde{\mathbf{X}}$  follows directly from the cited result. The result for  $\mathbf{X}$  uses the following fact: let  $\mathbf{M}_1$  be an  $m \times n$  matrix and let  $\mathbf{M}_2$  be an  $n \times m$  matrix, with  $n \geq m$ , then the  $n$  eigenvalues of  $\mathbf{M}_2\mathbf{M}_1$  are the  $m$  eigenvalues of  $\mathbf{M}_1\mathbf{M}_2$  with the extra eigenvalues being 0. So we note that if  $\mathbf{X}$  is an  $n \times p$  matrix with  $p \geq n$  then the  $p$  eigenvalues of  $\mathbf{X}^*\mathbf{X}$  are the  $n$  eigenvalues of  $\mathbf{X}\mathbf{X}^*$  with the extra eigenvalues being 0. The cited result tells us  $P(\sigma_{\max}(\mathbf{X}^*) \geq 1 + \sqrt{\delta} + \epsilon)$  and  $P(\sigma_{\min}(\mathbf{X}^*) \leq 1 - \sqrt{\delta} - \epsilon)$  are upper bounded by  $e^{-n\epsilon^2/2}$ . We note that  $\sigma_{\min}(\mathbf{X}^*) = \lambda_{\min}(\mathbf{X}\mathbf{X}^*)$  and  $\sigma_{\max}(\mathbf{X}^*) = \lambda_{\max}(\mathbf{X}\mathbf{X}^*)$ . The lemma result follows from the stated fact. □

**Lemma 6.** *Let  $\{\tau_t^2\}_{t \geq 0}$  be the state evolution sequence and let  $\theta_t = \alpha\tau_t$  for all  $t \geq 0$ . Then,*

$$\begin{aligned} & \left| P(|B - \tau_{t-1}Z_t| > \theta_t) - P(|B - \tau_*Z| \geq \theta_*) \right| \\ & \leq \frac{2\mathbb{E}|B|}{\min\{\tau_0^2, \tau_*^2\}} |\tau_t - \tau_*|. \end{aligned}$$

In the above  $B \sim p\beta$  is independent of  $Z_t, Z$  both standard Gaussian.

*Proof.* We first note that

$$P(|B - \tau_*Z| \geq \theta_*) = \mathbb{E}\{P(|B - \tau_*Z| \geq \theta_* | B)\},$$

and so we first study the conditional probability

$$P(|B - \tau_*Z| \geq \theta_* | B = b) = P(|b - \tau_*Z| \geq \theta_*).$$

First, using  $\Phi(\cdot)$  to denote the Gaussian cdf, namely  $\Phi(x) = P(Z \leq x)$  for standard Gaussian  $Z$ , and the fact that  $\theta_* = \alpha\tau_*$ ,

$$\begin{aligned} & P(|b - \tau_*Z| \geq \theta_*) \\ & = P(b - \tau_*Z \geq \theta_*) + P(b - \tau_*Z \leq -\theta_*) \\ & = P(Z \leq (b/\tau_*) - \alpha) + P(Z \geq (b/\tau_*) + \alpha) \\ & = \Phi((b/\tau_*) - \alpha) + \Phi((-b/\tau_*) - \alpha). \end{aligned}$$

Similarly,

$$P(|b - \tau_t Z_t| \geq \theta_t) = \Phi((b/\tau_t) - \alpha) + \Phi((-b/\tau_t) - \alpha),$$

and by Jensen’s inequality,

$$\begin{aligned} & \left| P(|B - \tau_t Z_t| > \theta_t) - P(|B - \tau_* Z| \geq \theta_*) \right| \\ &= \left| \mathbb{E} \left\{ P(|B - \tau_t Z_t| > \theta_t | B) - P(|B - \tau_* Z| \geq \theta_* | B) \right\} \right| \\ &\leq \mathbb{E} \left\{ \left| P(|B - \tau_t Z_t| > \theta_t | B) - P(|B - \tau_* Z| \geq \theta_* | B) \right| \right\}. \end{aligned} \quad (1)$$

Then, letting  $h(b) := \left| P(|B - \tau_t Z_t| > \theta_t | B = b) - P(|B - \tau_* Z| \geq \theta_* | B = b) \right|$ , we have

$$\begin{aligned} h(b) &= \left| \mathbb{E} \left\{ \mathbb{I}\{|b - \tau_t Z_t| > \theta_t\} - \mathbb{I}\{|b - \tau_* Z| \geq \theta_*\} \right\} \right| \\ &= \left| P(|b - \tau_t Z_t| > \theta_t) - P(|b - \tau_* Z| \geq \theta_*) \right| \\ &\leq \mathbb{E} \left| \Phi((b/\tau_t) - \alpha) - \Phi((b/\tau_*) - \alpha) \right| \\ &\quad + \mathbb{E} \left| \Phi((-b/\tau_t) - \alpha) - \Phi((-b/\tau_*) - \alpha) \right| \end{aligned} \quad (2)$$

Now we note that the Gaussian cdf is Lipschitz. Indeed, for  $x > y$ , and  $\phi(\cdot)$  the Gaussian pdf,

$$|\Phi(x) - \Phi(y)| = \int_y^x \phi(z) dz \leq |x - y|,$$

and so (2) gives the following upper bound

$$h(b) \leq |b| \left| \frac{1}{\tau_t} - \frac{1}{\tau_*} \right| + \mathbb{E}|B| \left| \frac{1}{\tau_*} - \frac{1}{\tau_t} \right| = 2|b| \frac{|\tau_* - \tau_t|}{\tau_t \tau_*}. \quad (3)$$

Finally, note from (1) and (3) that  $T \leq \mathbb{E}[h(B)] \leq \frac{2\mathbb{E}|B|}{\min\{\tau_0^2, \tau_*^2\}} |\tau_* - \tau_t - 1|$ .  $\square$

**Lemma 7.** *Let  $\lambda > 0$  and  $\alpha = \alpha(\lambda)$ , then for  $0 \leq t \leq T^*$ ,*

$$P\left(\left|\frac{1}{p}\|\beta^t\|^2 - \mathbb{E}\left[(\eta(B + \tau_t Z; \theta_t))^2\right]\right| \geq \epsilon\right) \leq K_t e^{-\kappa_t n \epsilon^2}. \quad (4)$$

Moreover, with  $\hat{\mathbf{B}} := \tilde{\mathbf{C}}\mathbf{C}^2 + 4\tilde{\mathbf{C}}\mathbf{C}/c_{\min}$  and  $\tilde{\mathbf{B}} = 1 + \max(6\sigma_0^2 + 6\max\{\tau_0^2, \tau_*^2\}(1 + \alpha^2), \tilde{\mathbf{C}})$ , where  $\tilde{\mathbf{C}}$  and  $\mathbf{C}$  are independent of  $t$  and are defined in the proof below,  $c_{\min}$  is the concentrating values for the minimum (non-zero) singular values of the matrix  $\mathbf{X}$  as defined in Lemma 4, Condition (4) in the main document,  $\sigma_0^2$  is defined in Eq. (8) in the main document, and  $\sigma^2$  is the noise variance in the problem, we have

$$P(\|\hat{\beta}(\lambda)\|^2/p \geq \hat{\mathbf{B}}) \leq K e^{-\kappa n},$$

and

$$P(\|\beta^t\|^2/p \geq \tilde{\mathbf{B}}) \leq K_t e^{-\kappa_t n}.$$

*Proof.* Note that the concentration for the norm of  $\beta^t$  follows from Theorem 1 in the main document using the pseudo-Lipschitz function  $\phi(a, b) = a^2$ . Namely, we know that

$$P\left(\left|\frac{1}{p}\|\beta^t\|^2 - \mathbb{E}\left[(\eta(B + \tau_t Z; \theta_t))^2\right]\right| \geq \epsilon\right) \leq K_t e^{-\kappa_t n \epsilon^2},$$

where, for each  $0 \leq t \leq T^*$ ,

$$\begin{aligned} & \mathbb{E}\left[(\eta(B + \tau_t Z; \theta_t))^2\right] \\ &\stackrel{(a)}{=} \mathbb{E}\left[(B + \tau_t Z - \theta_t)^2 \mathbb{I}\{B + \tau_t Z > \theta_t\}\right] \\ &\quad + \mathbb{E}\left[(B + \tau_t Z + \theta_t)^2 \mathbb{I}\{B + \tau_t Z < -\theta_t\}\right] \\ &\stackrel{(b)}{\leq} \mathbb{E}[(B + \tau_t Z - \theta_t)^2] + \mathbb{E}[(B + \tau_t Z + \theta_t)^2] \\ &\stackrel{(c)}{\leq} 6\mathbb{E}\{B^2\} + 6\tau_t^2 \mathbb{E}\{Z^2\} + 6\theta_t^2 \\ &\leq 6\sigma_0^2 + 6\tau_t^2 + 6\alpha^2 \tau_t^2 \stackrel{(d)}{\leq} 6\sigma_0^2 + 6\max\{\tau_0^2, \tau_*^2\}(1 + \alpha^2). \end{aligned}$$

In the chain above, step (a) follows from the definition of the soft-thresholding function in Eq. (4) of the main document, step (b) since the indicator function is upper bounded by 1 and we’re considering the expectation of a positive term, step (c) from [Rush and Venkataramanan, 2015, Lemma C.3], and step (d) since  $\tau_t^2 \leq \max\{\tau_0^2, \tau_*^2\}$ . The result in the lemma statement follows since

$$\begin{aligned} & P(\|\beta^t\|^2/p \geq \tilde{\mathbf{B}}) \\ &\leq P(\|\beta^t\|^2/p \geq \mathbb{E}[(\eta(B + \tau_t Z; \theta_t))^2] + \epsilon) \\ &\leq P(\|\beta^t\|^2/p - \mathbb{E}[(\eta(B + \tau_t Z; \theta_t))^2] \geq \epsilon). \end{aligned}$$

The first inequality above follows since  $\tilde{\mathbf{B}} \geq 1 + 6\sigma_0^2 + 6\max\{\tau_0^2, \tau_*^2\}(1 + \alpha^2) \geq \epsilon + \mathbb{E}[(\eta(B + \tau_t Z; \theta_t))^2]$ .

Now consider concentration for  $\hat{\beta}$ . We will first show that  $\mathcal{C}(\hat{\beta})$  is lower bounded by a constant with high probability. We have the following upper bound on the LASSO cost function:

$$\begin{aligned} \mathcal{C}(\hat{\beta}) &\leq \mathcal{C}(0) = \frac{1}{2}\|\mathbf{y}\|^2 = \frac{1}{2}\|\mathbf{X}\beta + \mathbf{w}\|^2 \\ &\stackrel{(a)}{\leq} \|\mathbf{X}\beta\|^2 + \|\mathbf{w}\|^2 \stackrel{(b)}{\leq} \sigma_{\max}^2(\mathbf{X})\|\beta\|^2 + \|\mathbf{w}\|^2, \end{aligned} \quad (5)$$

where step (a) follows by Cauchy-Schwarz and step (b) from Lemma 3. Now for  $\epsilon' \in (0, 1)$ , note that  $(c_{\max} + \epsilon')(\sigma_0^2 + \epsilon') + \sigma^2 + \epsilon' \leq (c_{\max} + 1)(\sigma_0^2 + 1) + \sigma^2 + 1$  and we label  $\mathbf{C} := (c_{\max} + 1)(\sigma_0^2 + 1) + \sigma^2 + 1$ . Considering the above, then,

$$\begin{aligned} & P((\sigma_{\max}^2(\mathbf{X})\|\beta\|^2 + \|\mathbf{w}\|^2)/p \geq \mathbf{C}) \\ &\leq P(\sigma_{\max}^2(\mathbf{X}) \geq c_{\max} + \epsilon') + P(\|\beta\|^2/p \geq \sigma_0^2 + \epsilon') \\ &\quad + P(\|\mathbf{w}\|^2/p \geq \sigma^2 + \epsilon') \\ &\stackrel{(c)}{\leq} K e^{-\kappa n \epsilon'^2}. \end{aligned} \quad (7)$$

In the above, step (c) follows from Lemma 5, the assumption given in Eq. (8) in the main document, and Lemma 2. Then using (6) and (7),

$$\begin{aligned} & P(\mathcal{C}(\hat{\boldsymbol{\beta}})/p \geq C) \\ & \leq P((\sigma_{max}^2(\mathbf{X})\|\boldsymbol{\beta}\|^2 + \|\mathbf{w}\|^2)/p \geq C) \leq Ke^{-\kappa n \epsilon'^2}. \end{aligned} \quad (8)$$

Now we will relate  $\|\hat{\boldsymbol{\beta}}\|^2/p$  to  $\mathcal{C}(\hat{\boldsymbol{\beta}})/p$  and other terms lower-bounded by a constant with high probability. We write  $\hat{\boldsymbol{\beta}} = \hat{\boldsymbol{\beta}}^\perp + \hat{\boldsymbol{\beta}}^\parallel$  where  $\hat{\boldsymbol{\beta}}^\perp \in \ker(\mathbf{X})^\perp$  and  $\hat{\boldsymbol{\beta}}^\parallel \in \ker(\mathbf{X})$ . Since  $\hat{\boldsymbol{\beta}}^\parallel \in \ker(\mathbf{X})$  and  $\ker(\mathbf{X})$  is a random subspace of size  $p - n = p(1 - \delta)$ , by Kashin Theorem (Lemma 4), we have that for some constant  $\nu_1 = \nu_1(\delta)$ ,

$$P(\|\hat{\boldsymbol{\beta}}^\parallel\|_2^2 \geq \nu_1 \|\hat{\boldsymbol{\beta}}^\parallel\|_1^2/N) \leq Ke^{-p}. \quad (9)$$

Denote the event  $\{\|\hat{\boldsymbol{\beta}}^\parallel\|_2^2 \geq \nu_1 \|\hat{\boldsymbol{\beta}}^\parallel\|_1^2/p\}$  by  $\mathcal{E}$ , and by the above  $P(\mathcal{E}) \leq Ke^{-p}$ . Conditioned on  $\mathcal{E}^c$ , we have the following bound

$$\begin{aligned} \|\hat{\boldsymbol{\beta}}\|^2 &= \|\hat{\boldsymbol{\beta}}^\parallel\|^2 + \|\hat{\boldsymbol{\beta}}^\perp\|^2 \stackrel{(a)}{\leq} \frac{\nu_1}{p} \|\hat{\boldsymbol{\beta}}^\parallel\|_1^2 + \|\hat{\boldsymbol{\beta}}^\perp\|^2 \\ &\stackrel{(b)}{\leq} \frac{2\nu_1}{p} \|\hat{\boldsymbol{\beta}}^\parallel\|_1^2 + \frac{2\nu_1}{p} \|\hat{\boldsymbol{\beta}}^\perp\|_1^2 + \|\hat{\boldsymbol{\beta}}^\perp\|^2 \\ &\stackrel{(c)}{\leq} \frac{2\nu_1}{p} \left(\frac{1}{\lambda} \mathcal{C}(\hat{\boldsymbol{\beta}})\right)^2 + (2\nu_1 + 1) \|\hat{\boldsymbol{\beta}}^\perp\|^2, \end{aligned} \quad (10)$$

where step (a) holds since we are conditioning on  $\mathcal{E}^c$ , step (b) from the triangle inequality and Cauchy-Schwarz, and step (c) since  $\lambda \|\hat{\boldsymbol{\beta}}^\perp\|_1 \leq \mathcal{C}(\hat{\boldsymbol{\beta}})$  by the definition of the cost function and  $\|\hat{\boldsymbol{\beta}}^\perp\|_1 \leq \sqrt{p} \|\hat{\boldsymbol{\beta}}^\perp\|$  by Cauchy-Schwarz. Now we bound the second term on the RHS of (10):

$$\begin{aligned} \|\hat{\boldsymbol{\beta}}^\perp\|^2 &\stackrel{(d)}{\leq} \frac{\|\mathbf{X}\hat{\boldsymbol{\beta}}^\perp\|^2}{\hat{\sigma}_{min}^2(\mathbf{X})} \leq \frac{\|\mathbf{X}\hat{\boldsymbol{\beta}}^\perp - \mathbf{y} + \mathbf{y}\|^2}{\hat{\sigma}_{min}^2(\mathbf{X})} \\ &\stackrel{(e)}{\leq} \frac{2\|\mathbf{y} - \mathbf{X}\hat{\boldsymbol{\beta}}^\perp\|^2}{\hat{\sigma}_{min}^2(\mathbf{X})} + \frac{2\|\mathbf{y}\|^2}{\hat{\sigma}_{min}^2(\mathbf{X})} \\ &\leq \frac{2\mathcal{C}(\hat{\boldsymbol{\beta}})}{\hat{\sigma}_{min}^2(\mathbf{X})} + \frac{2\|\mathbf{X}\boldsymbol{\beta} + \mathbf{w}\|^2}{\hat{\sigma}_{min}^2(\mathbf{X})}. \end{aligned} \quad (11)$$

In the above, step (d) follows from the fact that  $\hat{\sigma}_{min}^2(\mathbf{X})\|\hat{\boldsymbol{\beta}}^\perp\|^2 \leq \|\mathbf{X}\hat{\boldsymbol{\beta}}^\perp\|^2$  by Lemma 3 and step (e) by Cauchy-Schwarz. Next note

$$\|\mathbf{X}\boldsymbol{\beta} + \mathbf{w}\|^2 \leq 2(\|\mathbf{X}\boldsymbol{\beta}\|^2 + \|\mathbf{w}\|^2) \leq 2(\sigma_{max}^2(\mathbf{X})\|\boldsymbol{\beta}\|^2 + \|\mathbf{w}\|^2), \quad (12)$$

by Cauchy-Schwarz and Lemma 3. Now plugging (11) and (12) into (10) we have for some constant  $\tilde{C} =$

$$\max\left\{\frac{2\nu_1}{\lambda^2}, 4(2\nu_1 + 1)\right\} > 0,$$

$$\frac{1}{p} \|\hat{\boldsymbol{\beta}}\|^2 \leq \tilde{C} \left(\frac{\mathcal{C}(\hat{\boldsymbol{\beta}})}{p}\right)^2 + \frac{\tilde{C}(\mathcal{C}(\hat{\boldsymbol{\beta}}) + \sigma_{max}^2(\mathbf{X})\|\boldsymbol{\beta}\|^2 + \|\mathbf{w}\|^2)}{p\hat{\sigma}_{min}^2(\mathbf{X})}. \quad (13)$$

Now considering the above,

$$\begin{aligned} & P\left(\frac{1}{p} \|\hat{\boldsymbol{\beta}}\|^2 \geq \tilde{C}C^2 + \frac{2\tilde{C}C}{c_{min} - \epsilon'}\right) \\ & \leq P(\mathcal{E}) + P\left(\frac{1}{p} \|\hat{\boldsymbol{\beta}}\|^2 \geq \tilde{C}C^2 + \frac{2\tilde{C}C}{c_{min} - \epsilon'} \middle| \mathcal{E}^c\right). \end{aligned} \quad (14)$$

First note  $P(\mathcal{E}) \leq Ke^{-p}$  by (9), and

$$\begin{aligned} & P\left(\frac{1}{p} \|\hat{\boldsymbol{\beta}}\|^2 \geq \tilde{C}C^2 + \frac{2\tilde{C}C}{c_{min} - \epsilon'} \middle| \mathcal{E}^c\right) \\ & \stackrel{(a)}{\leq} P\left(\tilde{C} \left(\frac{\mathcal{C}(\hat{\boldsymbol{\beta}})}{p}\right)^2 + \frac{\tilde{C}(\mathcal{C}(\hat{\boldsymbol{\beta}}) + \sigma_{max}^2(\mathbf{X})\|\boldsymbol{\beta}\|^2 + \|\mathbf{w}\|^2)}{N\hat{\sigma}_{min}^2(\mathbf{X})}\right. \\ & \quad \left. \geq \tilde{C}C^2 + \frac{2\tilde{C}C}{c_{min} - \epsilon'}\right) \\ & \stackrel{(b)}{\leq} P\left(\frac{\mathcal{C}(\hat{\boldsymbol{\beta}})}{p} \geq C\right) + P\left(\sigma_{max}^2(\mathbf{X})\frac{\|\boldsymbol{\beta}\|^2}{p} + \frac{\|\mathbf{w}\|^2}{p} \geq C\right) \\ & \quad + P(\hat{\sigma}_{min}^2(\mathbf{X}) \leq c_{min} - \epsilon') \\ & \stackrel{(c)}{\leq} Ke^{-\kappa n \epsilon'^2}. \end{aligned} \quad (15)$$

In the above, step (a) follows by (13), step (b) since if

$$\begin{aligned} & \left\{\frac{\mathcal{C}(\hat{\boldsymbol{\beta}})}{p} \leq C\right\} \cap \left\{\frac{1}{p}(\sigma_{max}^2(\mathbf{X})\|\boldsymbol{\beta}\|^2 + \|\mathbf{w}\|^2) \leq C\right\} \\ & \quad \cap \left\{\hat{\sigma}_{min}^2(\mathbf{X}) \geq c_{min} - \epsilon'\right\}, \end{aligned}$$

then

$$\begin{aligned} & \tilde{C} \left(\frac{\mathcal{C}(\hat{\boldsymbol{\beta}})}{p}\right)^2 + \frac{\tilde{C}(\mathcal{C}(\hat{\boldsymbol{\beta}}) + \sigma_{max}^2(\mathbf{X})\|\boldsymbol{\beta}\|^2 + \|\mathbf{w}\|^2)}{p\hat{\sigma}_{min}^2(\mathbf{X})} \\ & \leq \tilde{C}C^2 + \frac{2\tilde{C}C}{c_{min} - \epsilon'}, \end{aligned} \quad (16)$$

and step (c) from (7), (8), and Lemma 5. Finally, labeling  $\hat{B} := \tilde{C}C^2 + 4\tilde{C}C/c_{min} \geq \tilde{C}C^2 + 2\tilde{C}C/(c_{min}/2)$ , it follows from (14) - (15) that,

$$\begin{aligned} & P\left(\frac{\|\hat{\boldsymbol{\beta}}\|^2}{p} \geq \hat{B}\right) \leq P\left(\frac{\|\hat{\boldsymbol{\beta}}\|^2}{p} \geq \tilde{C}C^2 + \frac{2\tilde{C}C}{c_{min} - c_{min}/2}\right) \\ & \leq Ke^{-\kappa n c_{min}^2/4}. \end{aligned}$$

□

## References

[Kashin, 1977] Kashin, B. S. (1977). Diameters of some finite-dimensional sets and classes of smooth functions. *Izvestiya Rossiiskoi Akademii Nauk. Seriya Matematicheskaya*, 41(2):334–351.

[Rudelson and Vershynin, 2010] Rudelson, M. and Vershynin, R. (2010). Non-asymptotic theory of random matrices: extreme singular values. In *Proceedings of the International Congress of Mathematicians 2010 (ICM 2010) (In 4 Volumes) Vol. I: Plenary Lectures and Ceremonies Vols. II–IV: Invited Lectures*, pages 1576–1602. World Scientific.

[Rush and Venkataramanan, 2015] Rush, C. and Venkataramanan, R. (2015). Finite sample analysis of approximate message passing. *Proc. IEEE Int. Symp. Inf. Theory*. Full version: <https://arxiv.org/abs/1606.01800>.
